# Supplementary material for: Single olfactory receptors set odor detection thresholds
Source: PubMed Central journal article supplement (PMC6056506; doi:10.1038/s41467-018-05129-0), 2018-07-23
Supplement: 41467_2018_5129_MOESM1_ESM.pdf [file 41467_2018_5129_MOESM1_ESM.pdf]

## Supplementary Information

### Single olfactory receptors set odor detection thresholds

Dewan et al.

Correspondence

Thomas Bozza

Department of Neurobiology

Northwestern University

2205 Tech Drive

Hogan 2-160

Evanston, IL 60208

(847) 467-2870

[bozza@northwestern.edu](mailto:bozza@northwestern.edu)

## Supplementary Figures

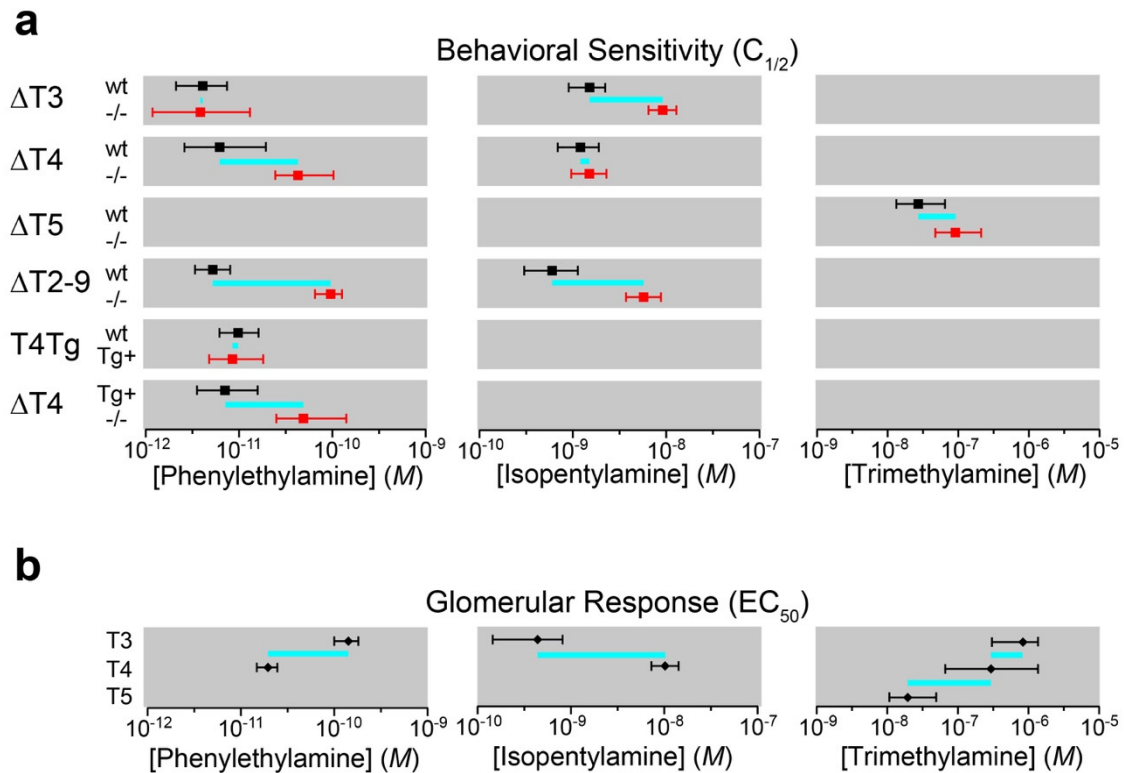

**Supplementary Figure 1.** Summary of amine sensitivities observed in all experiments. **(a)** Summary of behavioral sensitivities ( $C_{1/2}$  values) across 6 gene targeted mutant strains (red) and corresponding wild-type littermate controls or genetic rescue (black). The absolute sensitivity of each mouse strain can vary due to strain dependent variability in task performance. Thus, the most valid comparisons that can be made are within a given strain. The magnitude of sensitivity shifts within strains (mutant compared with corresponding wild-type) are marked by cyan lines. **(b)** Summary of receptor (glomerular) sensitivities ( $EC_{50}$  values) from in vivo calcium imaging of TAAR3, TAAR4 and TAAR5 glomeruli. Differences in sensitivity among receptors is indicated by cyan lines. Plots show either mean  $C_{1/2}$  +/- 95% CI or mean  $EC_{50}$  +/- 95% CI ( $n=6-10$ )

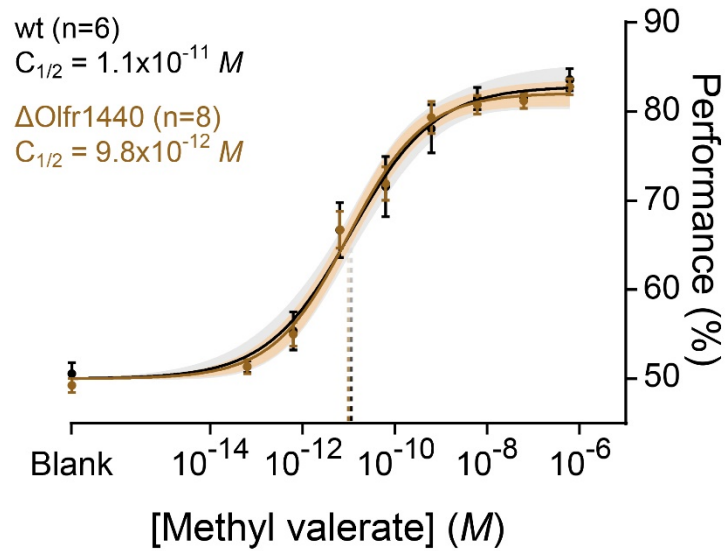

**Supplementary Figure 2.** Deleting *Olf1440* did not alter sensitivity to the control odor methyl valerate. Psychometric curves for  $\Delta Olf1440$  (tan) and wild-type littermate controls (black). Plot show mean  $\pm$  SE with a shaded 95% confidence interval. Curves were fitted via a non-linear regression using a variable slope model with the Hill equation. Behavioral sensitivity is defined as the odor concentration at half-maximal behavioral performance ( $C_{1/2}$ ) during a head-fixed Go No-Go conditioned assay. *wt*  $C_{1/2} = 1.1 \times 10^{-11} M$  (95% CI =  $4.6-31.2 \times 10^{-12} M$ );  $\Delta Olf1440$   $C_{1/2} = 9.8 \times 10^{-12} M$  (95% CI  $5.7-17.4 \times 10^{-12} M$ );  $p=0.81$ ;  $F=0.06$ , Sum-of-squares F-test.

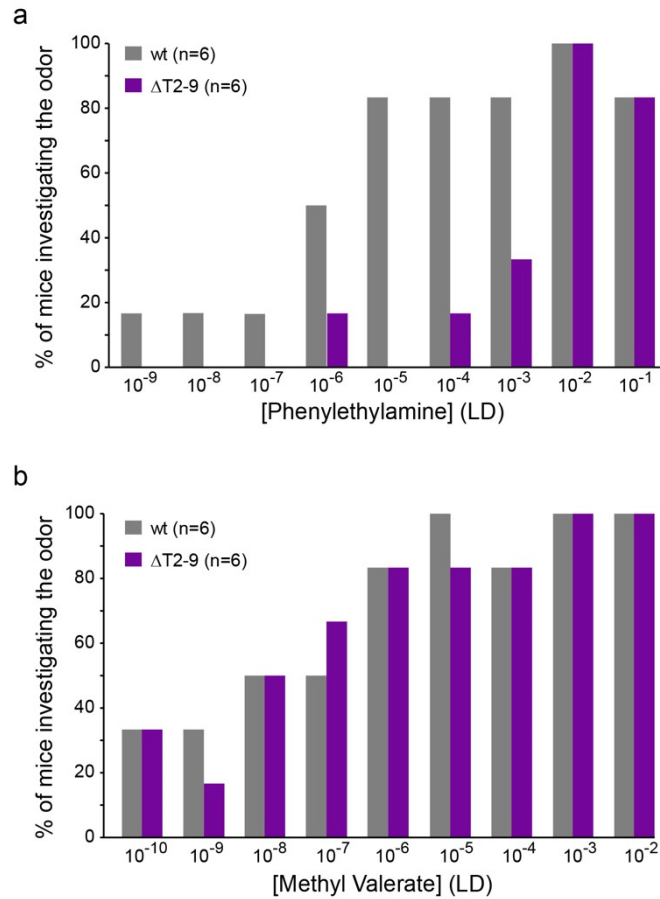

**Supplementary Figure 3.** Assessment of odor investigation in TAAR cluster deletion mice. Removing the olfactory TAARs causes a pronounced investigation deficit for phenylethylamine but not methyl valerate. Vertical axis represents the percentage of animals that found the odor source (glass capillary dipped in diluted odorant) within 3 minutes. Investigation was defined as active sniffing in close proximity to the odor source. (**a-b**) Percentage of wild-type (dark gray) and cluster deletion mice (purple) that investigated each serial dilution of phenylethylamine (top) and methyl valerate (bottom).
